# Supplementary material for: Myocardial hypertrophy in the absence of external stimuli is induced by angiogenesis in mice
Source: JCI journal article supplement (doi:10.1172/jci32024), 2007-11-01
Supplement: sd1 [file 1]

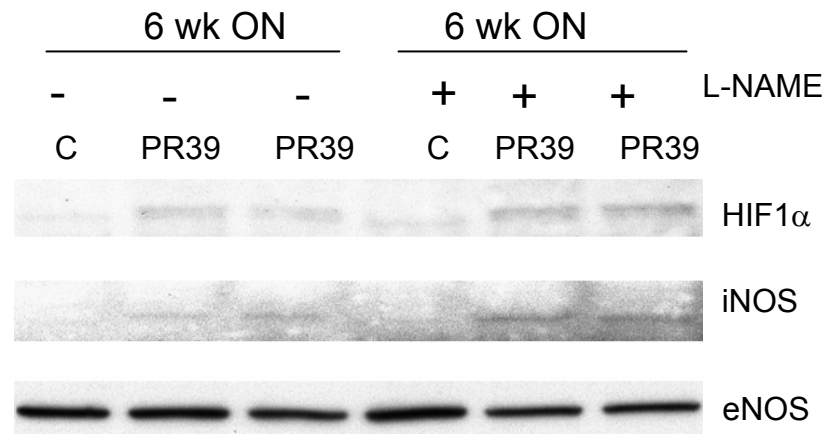

Supplementary Figure 1

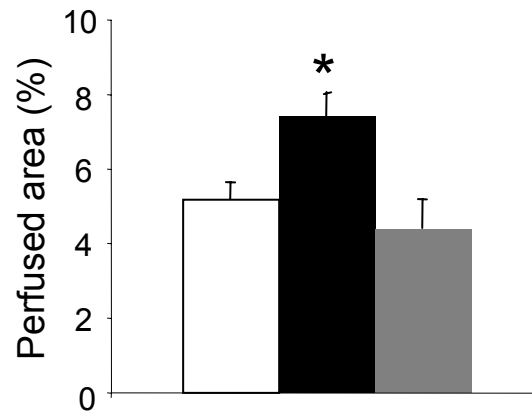

□ AdRR5    ■ AdVEGF-B<sub>167</sub>    ■ Sham

Supplementary Figure 2

## **Supplementary Figures**

### **Supplementary Figure 1.** PR39 induction increases HIF-1 $\alpha$ and iNOS expression.

Western blot analysis of myocardial tissues from tTA<sup>+</sup>/PR39<sup>+</sup> mice after 6 wk of PR39 induction in the presence (+) or absence (-) of L-NAME. Note an increase in HIF-1 $\alpha$  and iNOS expression. At the same time there were no changes in total eNOS expression. L-NAME treatment doesn't change HIF-1 $\alpha$ , iNOS or eNOS expression.

### **Supplementary Figure 2.** AdhVEGF-B<sub>167</sub> treatment increases perfusion area.

Perfusion areas determined by dividing the sum of all luminal vessel areas through the total area under investigation, was increased following AdhVEGF-B<sub>167</sub> treatment 28d post-MI, as compared to AdRR5 treated mice or sham. \* $p$ <0.05 vs. AdRR5.
